# Supplementary material for: Structural and Physicochemical Properties of Starch from Rejected Chestnut: Hydrothermal and High-Pressure Processing Dependence
Source: MDPI journal article supplement (doi:10.3390/molecules28020700), 2023-01-10
Supplement: s1 [file s1]

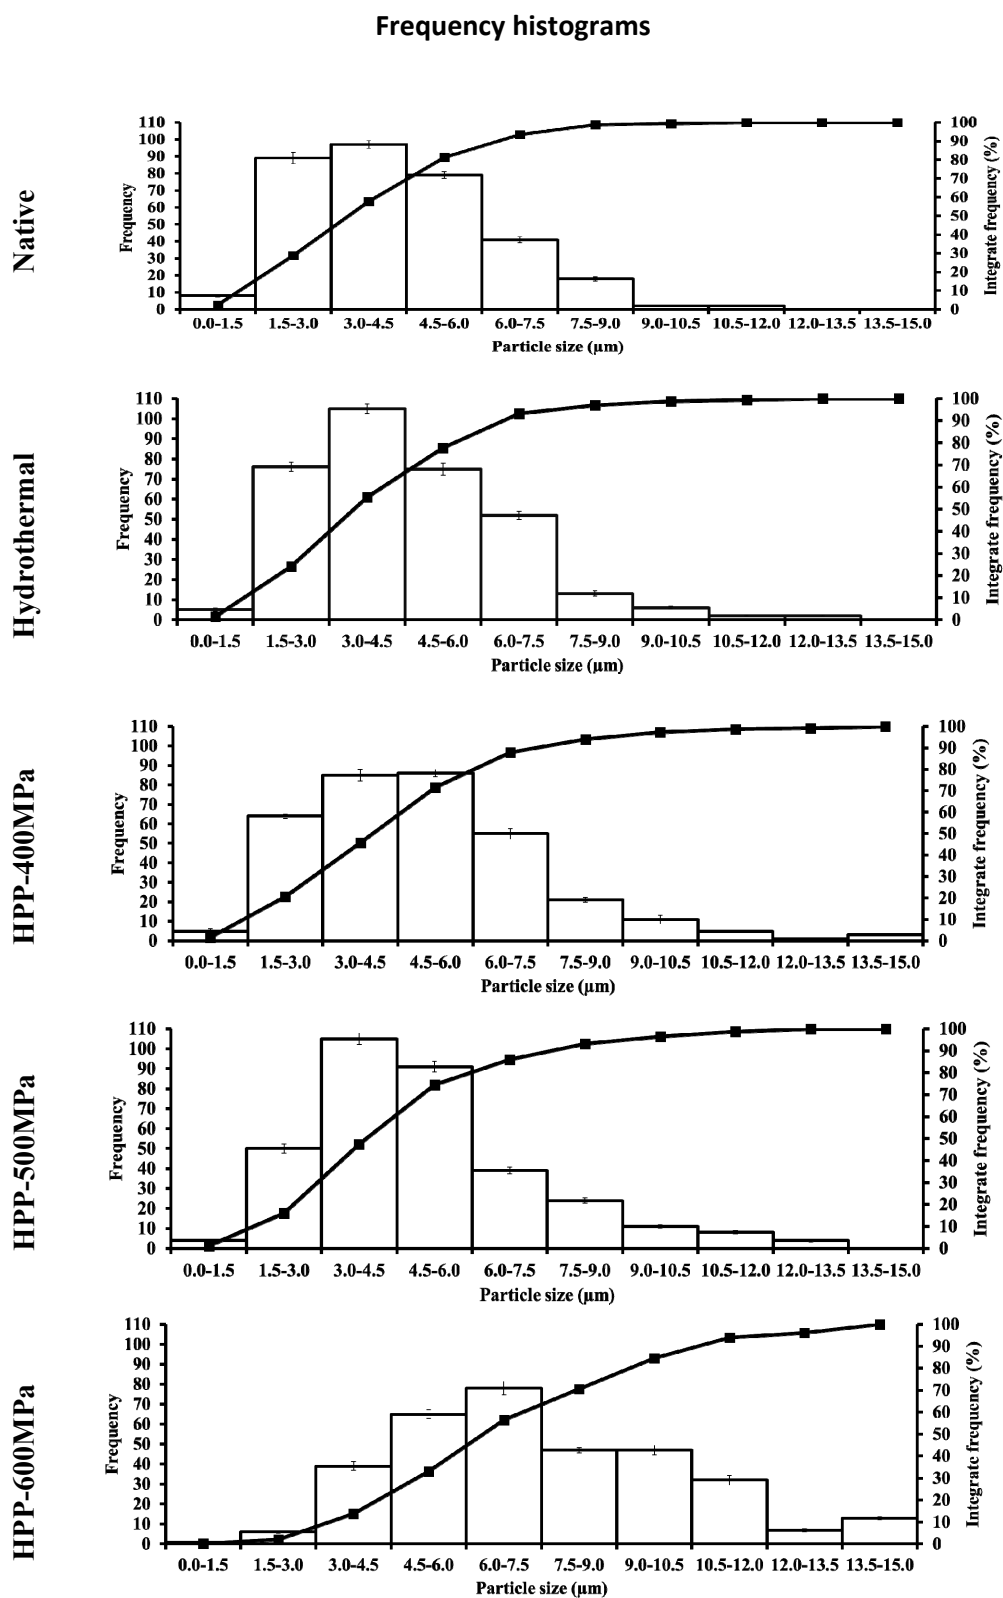

**Figure S1:** Frequency histograms of native and treated chestnut starch samples. Native – Control, Hydrothermal – Conventional, HPP – High-pressure processing.

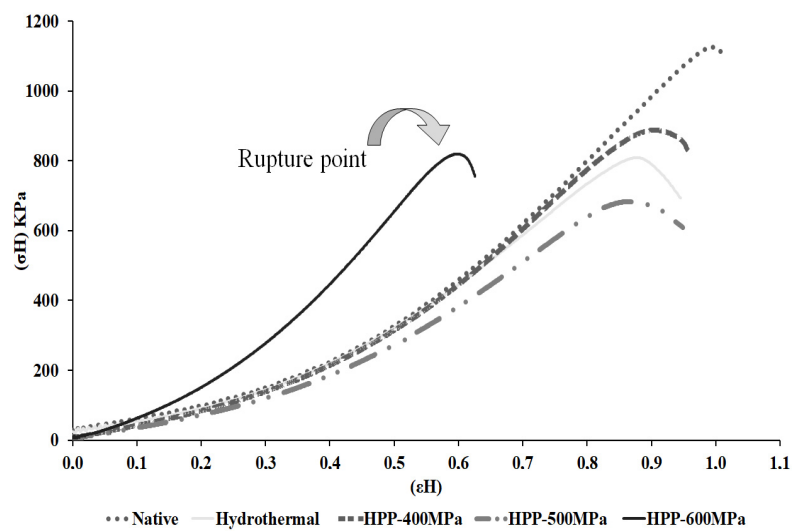

**Figure S2:** Stress-strain curves of native and treated chestnuts starch gel samples. Native – Control, Hydrothermal – Conventional, HPP – High-pressure processing.

**Table S1:** IR assignments of the main vibrations in the FTIR spectra from chestnut starch samples

| Band frequency<br>(cm <sup>-1</sup> ) | Vibrations (cm <sup>-1</sup> ) | Assignments                                                                  |
|---------------------------------------|--------------------------------|------------------------------------------------------------------------------|
|                                       | Starch                         |                                                                              |
| 3600 - 3000                           | 3273                           | O–H stretching broad band                                                    |
| 3000 - 2800                           | 2966                           | C–H asymmetric stretching band from CH <sub>3</sub> groups                   |
|                                       | 2925                           | C–H asymmetric stretching band from CH <sub>2</sub> groups                   |
|                                       | 2900                           | C–H symmetric stretching bands                                               |
|                                       | 2877                           |                                                                              |
|                                       | 2850                           |                                                                              |
| 1750 - 1500                           | 1642                           | C=O stretching band from carboxylic acid group                               |
|                                       | 1455                           | C=C stretching bands from aromatic rings                                     |
| 1500 - 1200                           | 1365                           | C–O stretching bands                                                         |
|                                       | 1335                           |                                                                              |
|                                       | 1242                           |                                                                              |
|                                       | 1147                           |                                                                              |
| 1200 - 650                            | 1077                           | is related to bending vibrational modes of C–O existing in the pyranose form |
|                                       | 1039                           | C–O stretching bands<br>(anhydro-glucose ring)                               |
|                                       | 1017                           |                                                                              |
|                                       | 996                            | C–O bond from C–O–C in the starch                                            |
|                                       | 928                            | C–O stretching bands<br>(anhydro-glucose ring)                               |
|                                       | 860                            | C–O stretching bands                                                         |
